# Supplementary material for: The key role of microscopic structure and graphene sheet-high homogenization in the high rate capability and cycling stability of Ni–Co LDH
Source: Royal Society of Chemistry journal article supplement (doi:10.1039/d0nr07346f), 2020-01-01
Supplement: d0nr07346f1.pdf [file d0nr07346f1.pdf]

## Key role of microscopic structure and graphene sheets-high homogenization in the high rate-capability and cycling stability of Ni-Co LDH

Xiaoxiao Wang, Jing Li, Yuanyuan Liu, Meiri Wang, Hongtao Cui\*

School of Chemistry and Chemical Engineering, Yantai University, 264005 Yantai, China.

E-mail: htcui@ytu.edu.cn; Fax: +86-535-6902623; Tel: +86-535-6902623

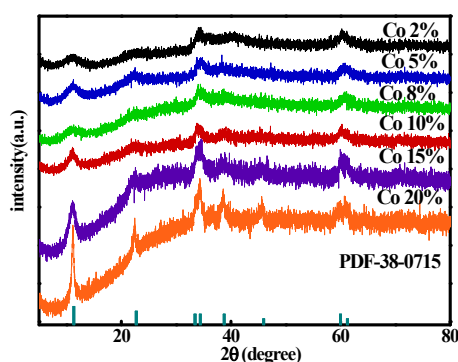

**Fig. S1** XRD patterns of Ni-Co LDH samples prepared with different cobalt ions percentages in the absence of PVP and graphene.

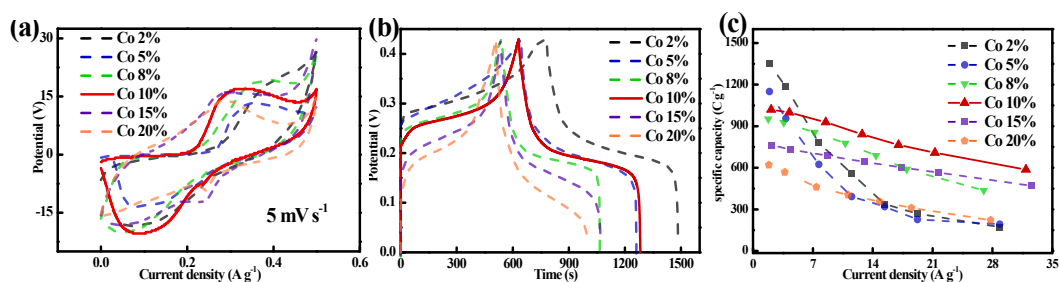

**Fig. S2** (a) CV curves at 10 mV s<sup>-1</sup> for the Ni-Co LDH samples prepared with different cobalt ions percentages in the absence of PVP and graphene; (b) GCD curves at current density of 2.5 A g<sup>-1</sup> for these samples; (c) curves of specific capacity vs. current density for these Ni-Co LDH samples.

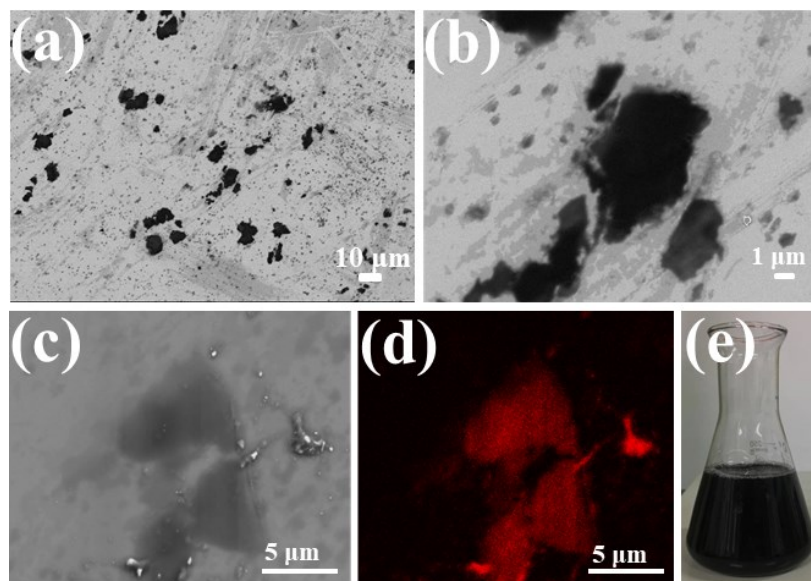

**Fig. S3** (a-c) FE-SEM images of graphene and (d) EDS carbon elemental mapping of graphene; (e) optical image of graphene suspension.

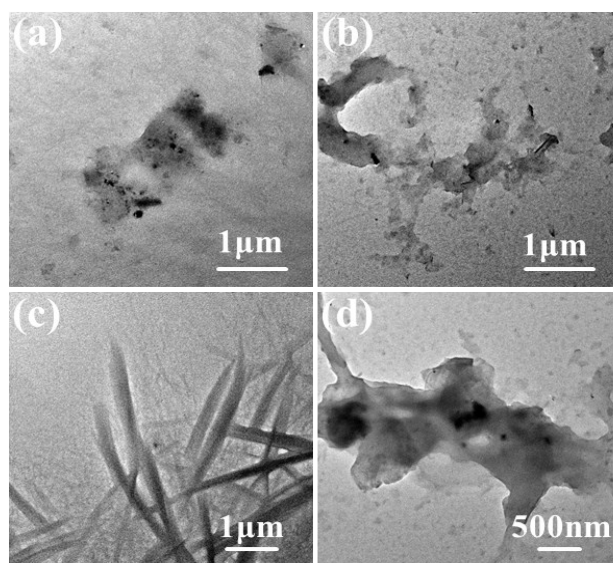

**Fig. S4** (a-d) TEM images of graphene.

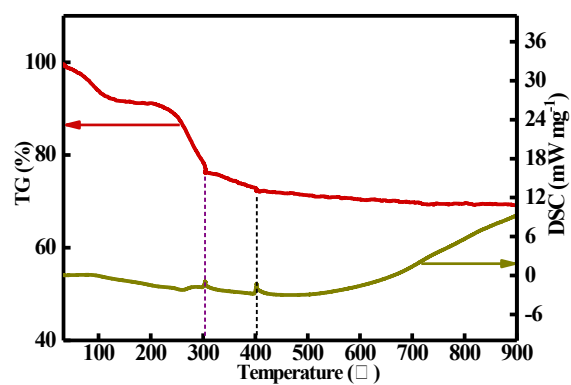

**Fig. S5** TG/DSC curves of sample PVP/G Ni-Co LDH.

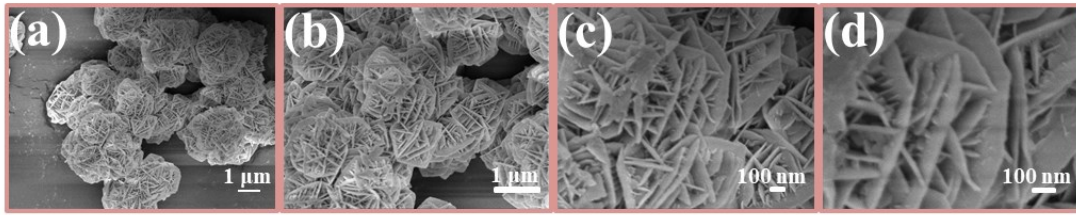

Fig. S6 (a-d) FE-SEM images of sample Non-HSM-PVP/G Ni-Co LDH.

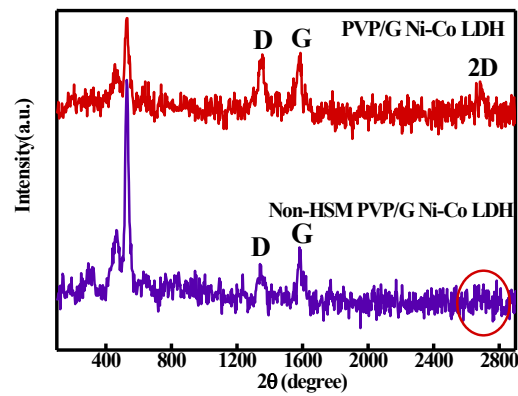

Fig. S7 Micro-Raman spectra of samples PVP/G Ni-Co LDH and Non-HSM-PVP/G Ni-Co LDH.

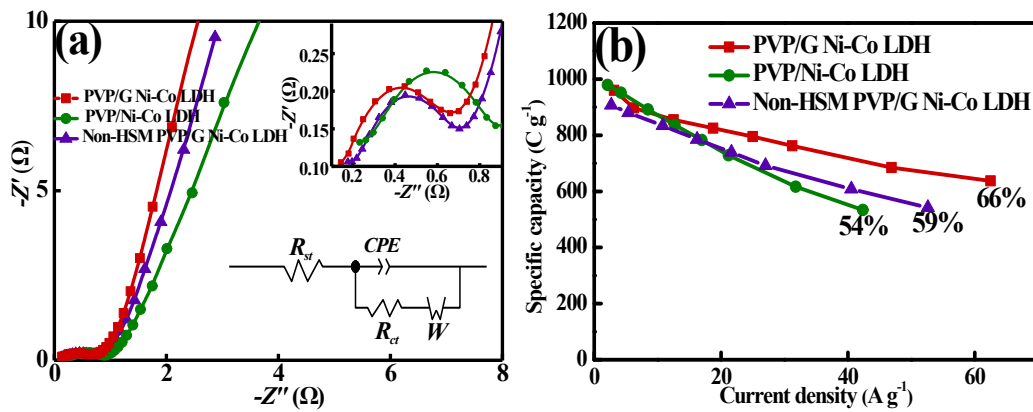

Fig. S8 (a) Nyquist plots and (b) curves of specific capacity vs. current density for samples PVP/Ni-Co LDH, PVP/G Ni-Co LDH and Non-HSM PVP/G Ni-Co LDH.
